# Supplementary material for: Herpes simplex type 1 pneumonitis and acute respiratory distress syndrome in a patient with chronic lymphatic leukemia: a case report
Source: Springer Nature journal article supplement (doi:10.1186/s13256-017-1495-9), 2017-11-21
Supplement: MOESM1 [file 15249314]

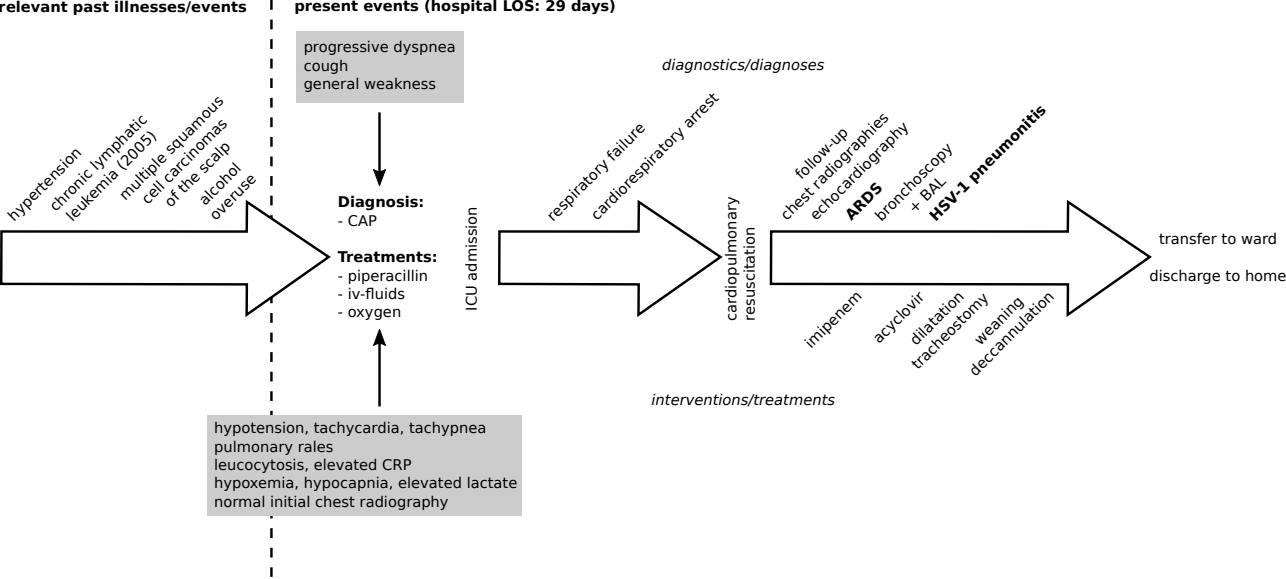

**Timeline.** Abbreviations: LOS = length of stay, CRP = C-reactive protein, CAP = community-acquired pneumonia, ARDS = acute respiratory distress syndrome, HSV-1 = Herpes simplex type 1
